# Supplementary material for: Restoration of CB1 receptor function in hippocampal GABAergic neurons rescues memory deficits in Huntington’s disease models
Source: Springer Nature journal article supplement (doi:10.1186/s40035-025-00500-w), 2025-08-25

Figura 1a

CB1R R6/1 males

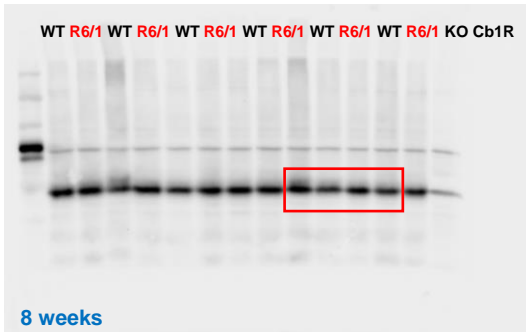

Actin R6/1 males

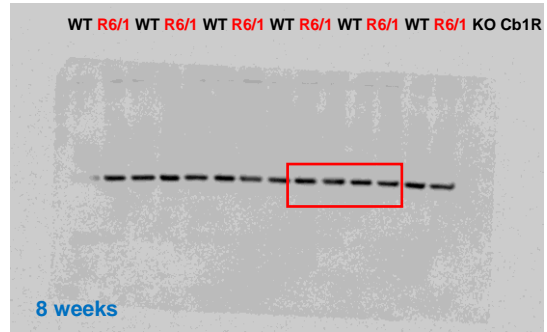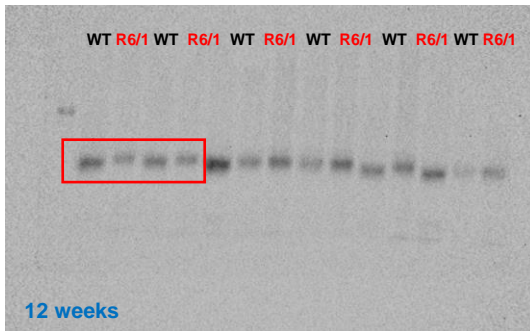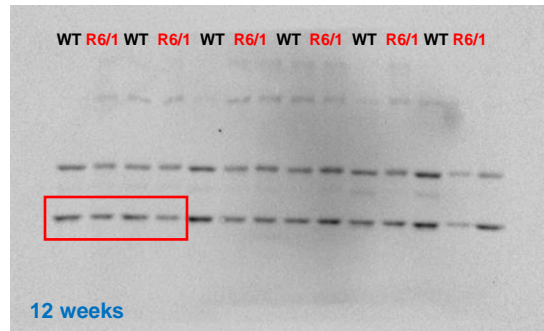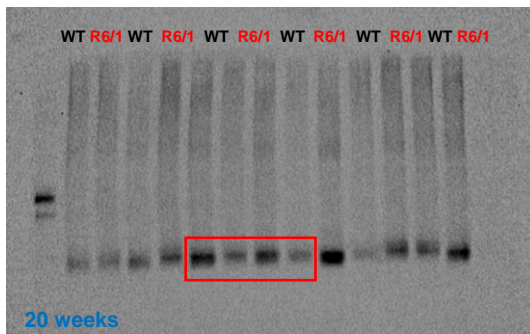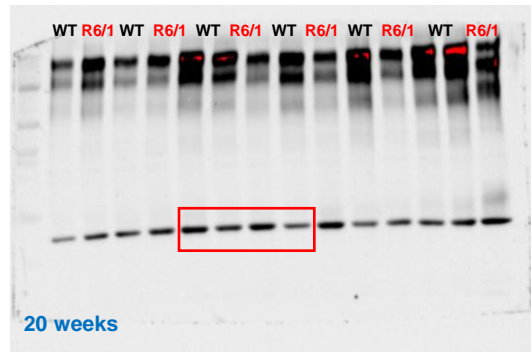

Figura 1a

CB1R R6/1 females

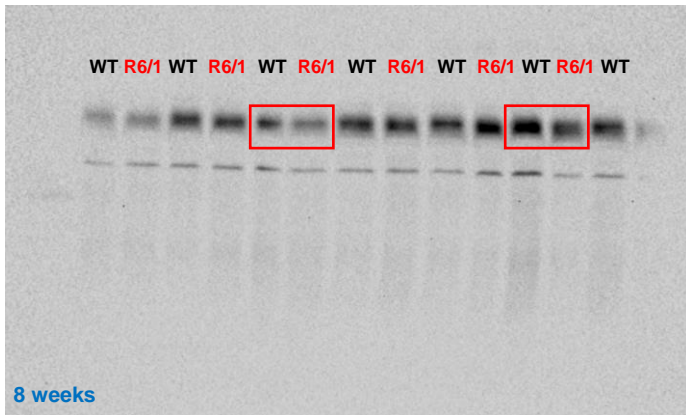

Actin R6/1 females

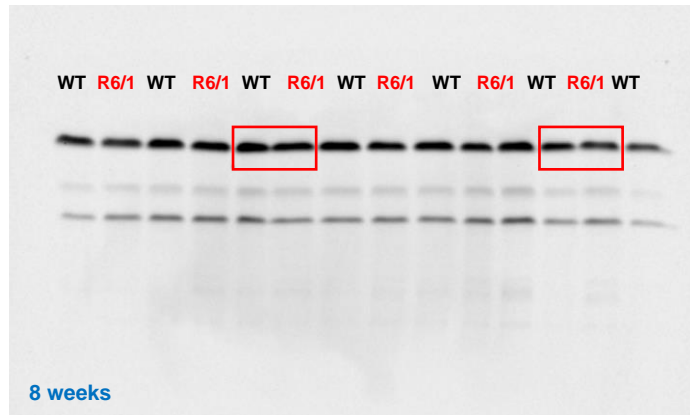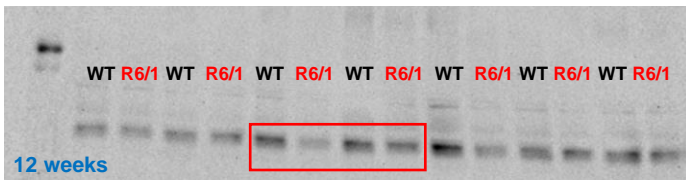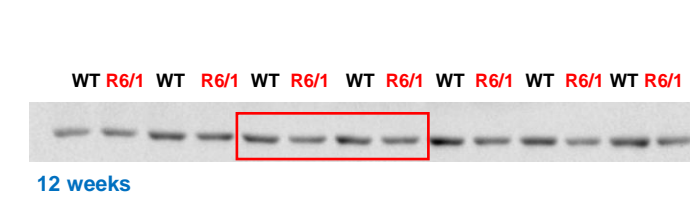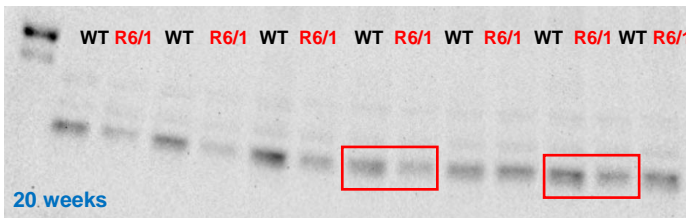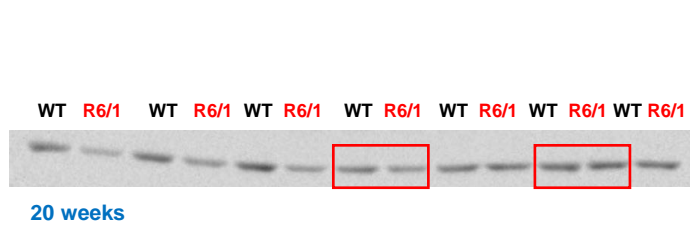

Figura 3c

CB1R WIN R6/1 mice

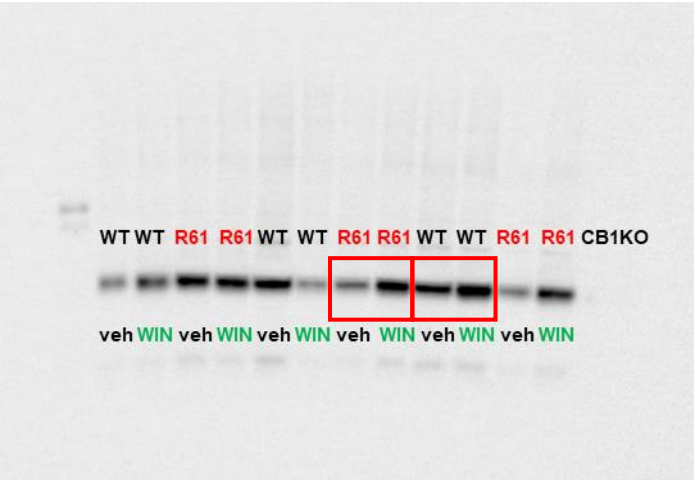

Actin

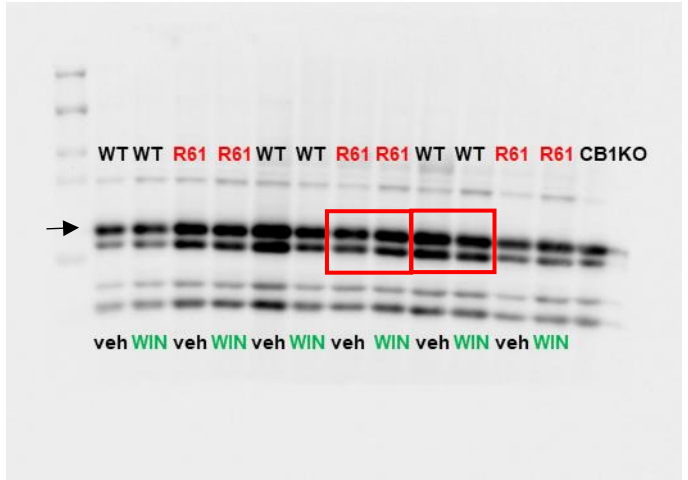

# SUPPLEMENTARY FIGURES

## Supplementary Figure 2

CB1R R6/1 mice-males (Cerebellum)

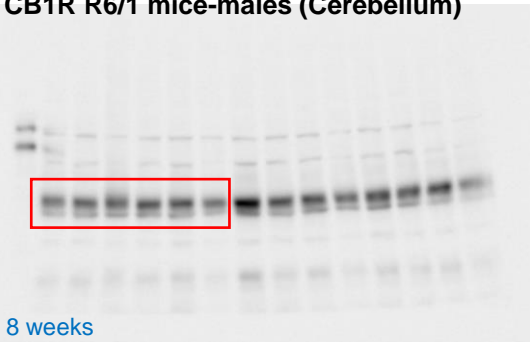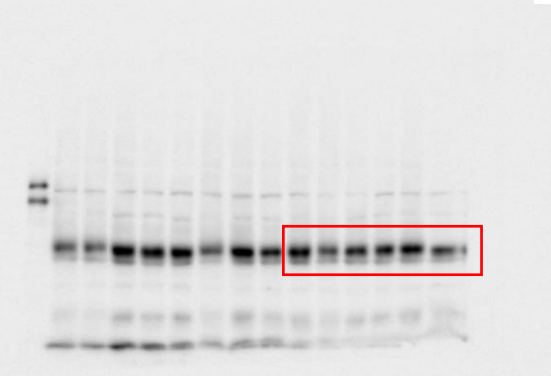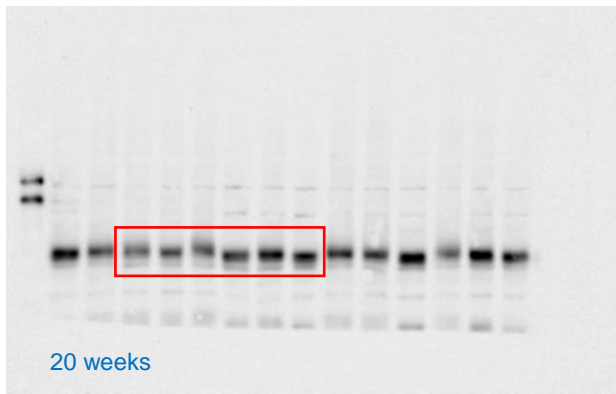

Actin R6/1 mice-males

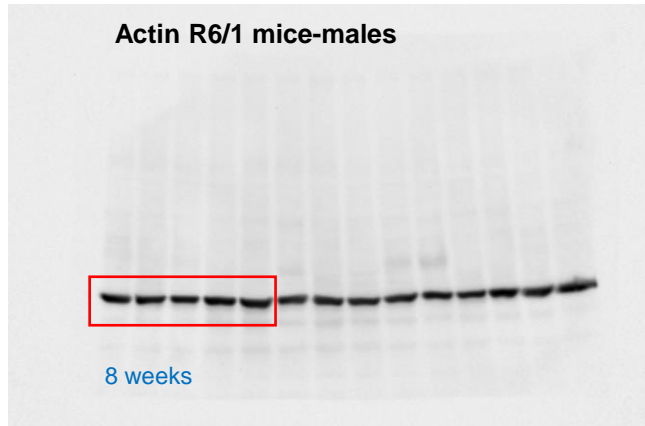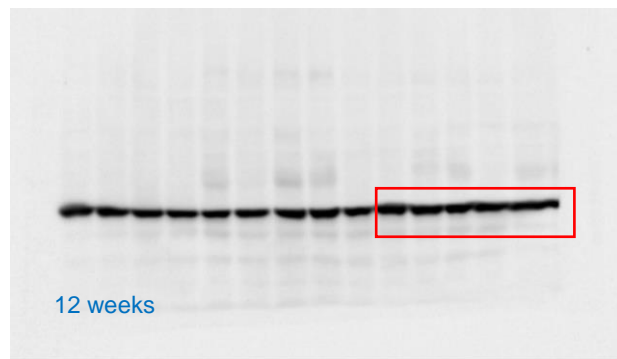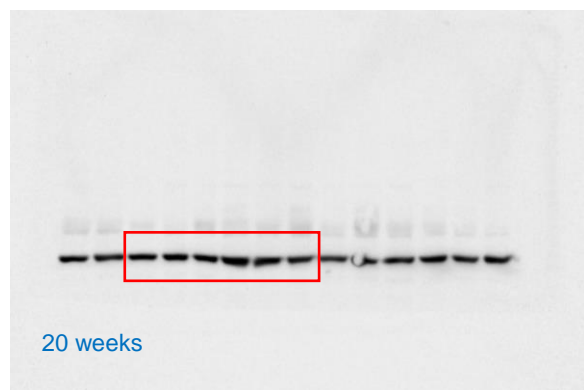

## Supplementary Figure 2

CB1R R6/1 mice-females (Cerebellum)

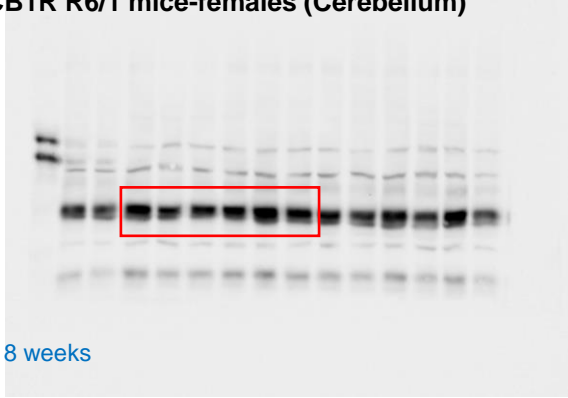

Actin R6/1 mice-females

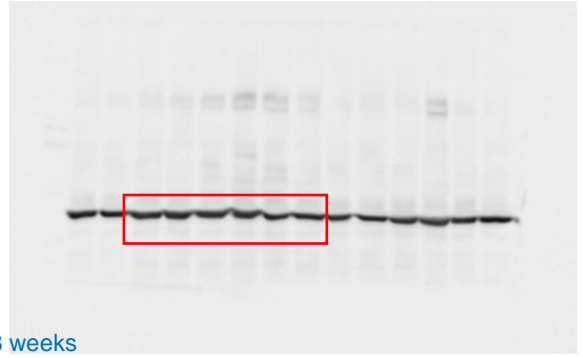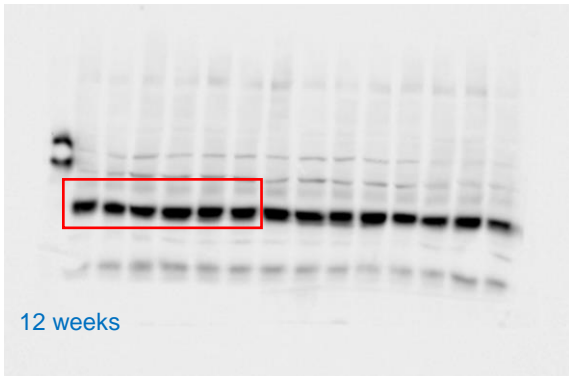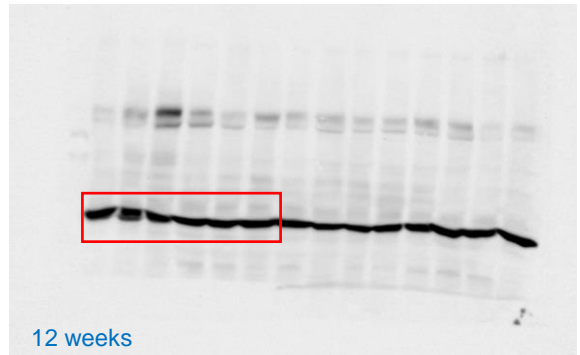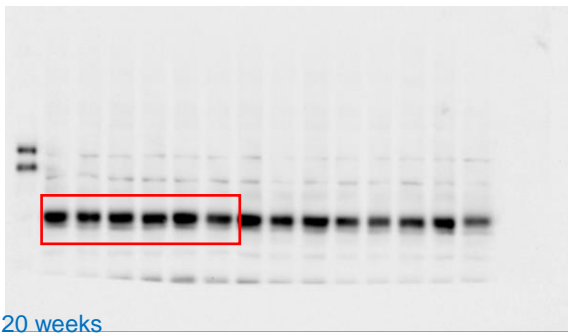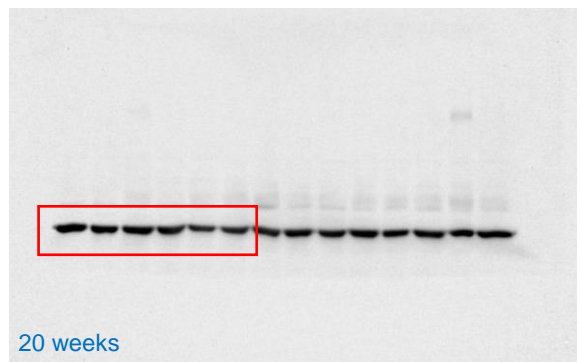

# Supplementary Figure 4

## Suppl Fig 5e

CB1R KI mice

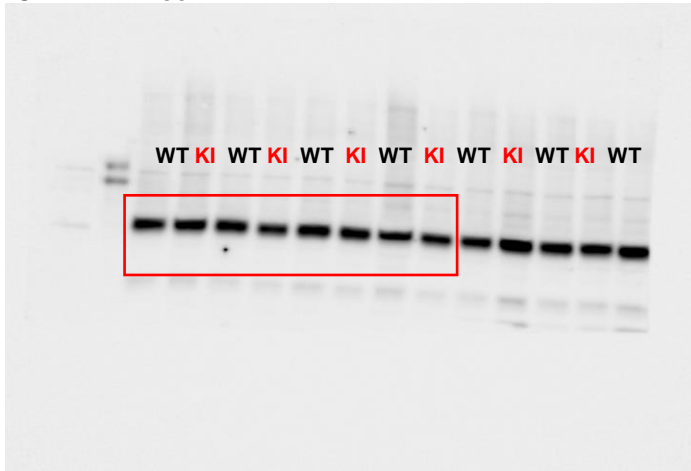

Actin

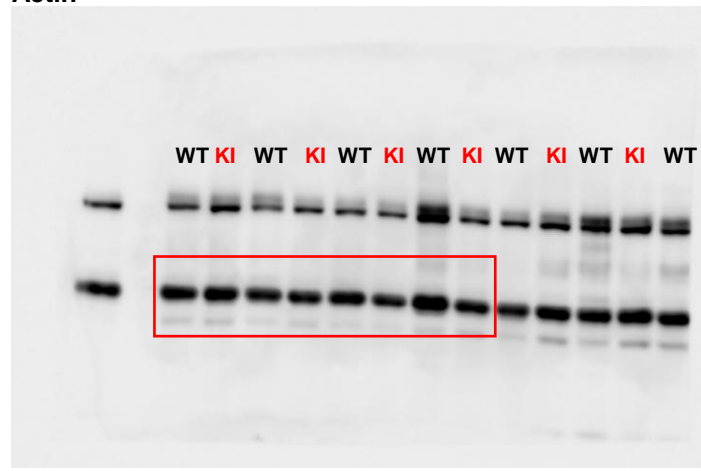

## Suppl Fig 5f

CB1R KI mice WIN

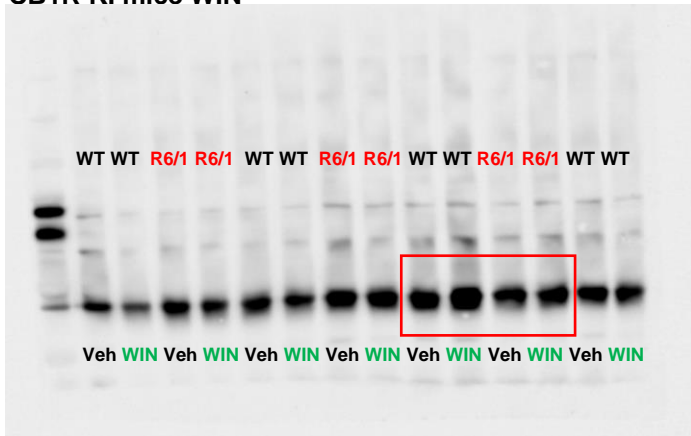

Actin

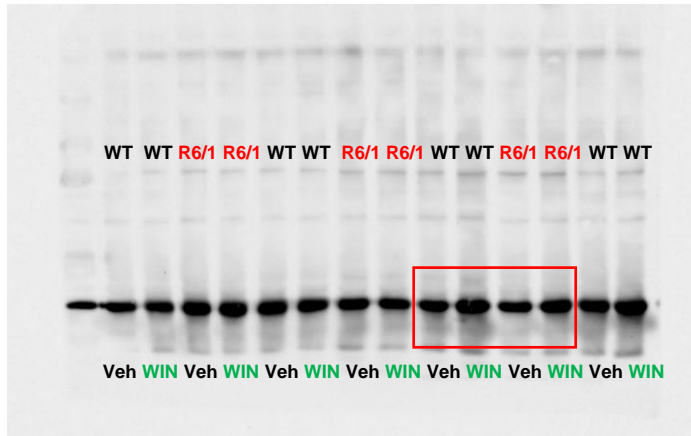

# Supplementary Figure 7

## Suppl Fig 7a

CB2R R6/1 males

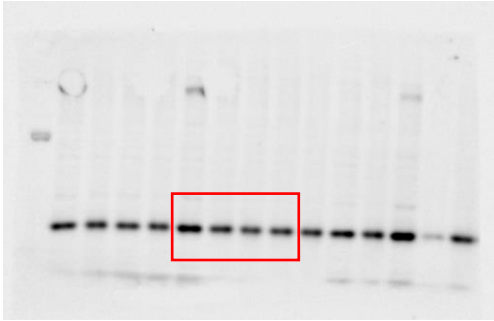

Actin

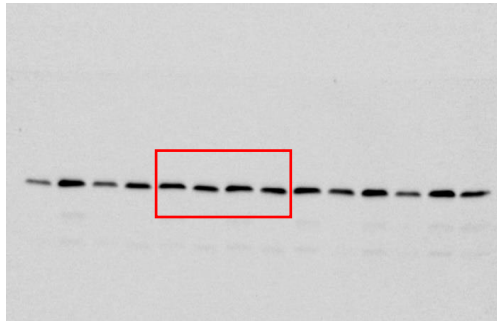

CB2R R6/1 females

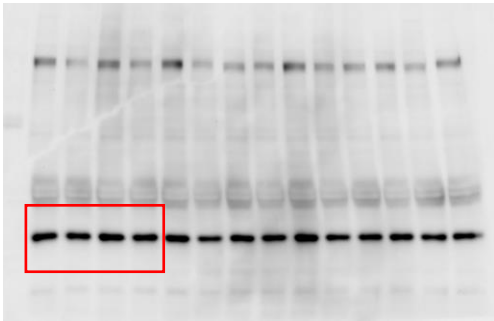

Actin

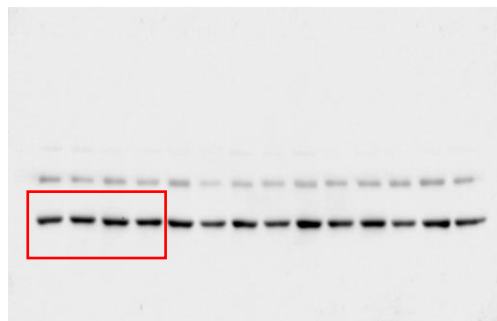

## Suppl Fig 7b

CB2R KI males

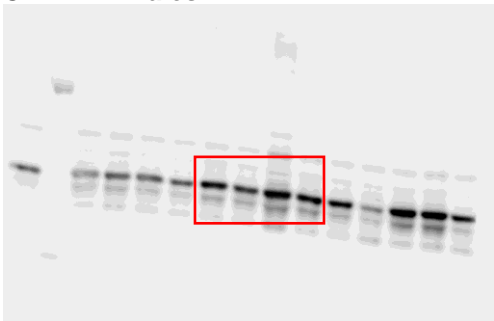

Actin

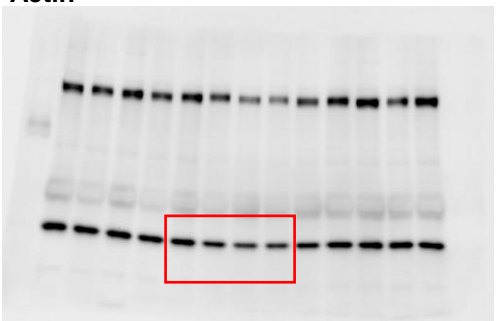

CB2R KI females

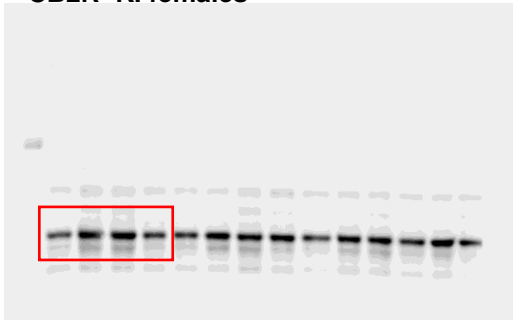

Actin

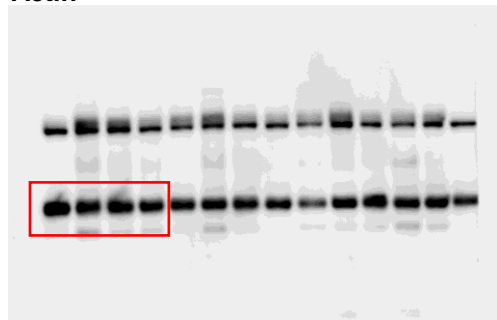

# Supplementary Figure 7

## Suppl Fig 7c

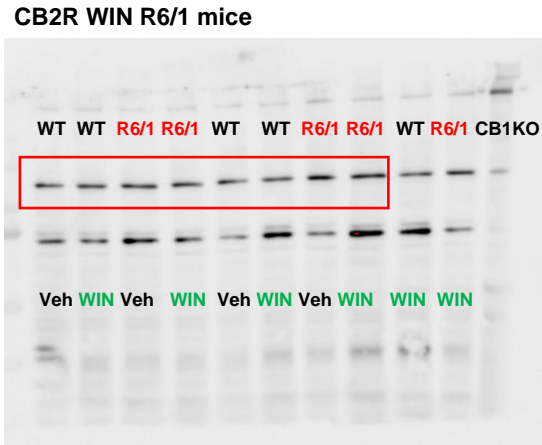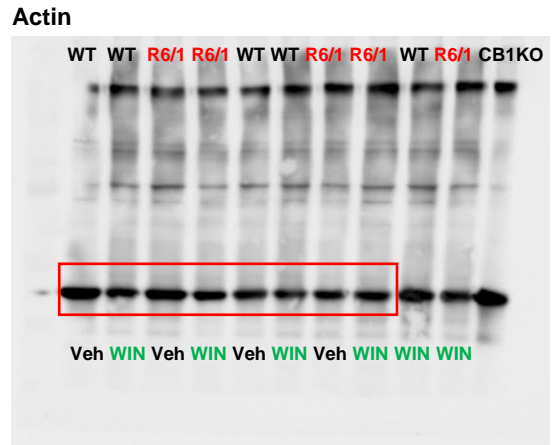

## Suppl Fig 7d

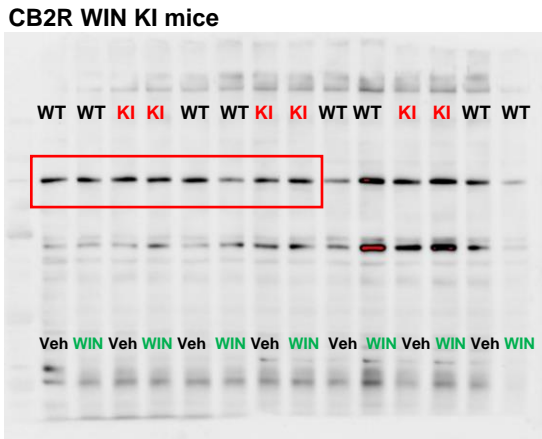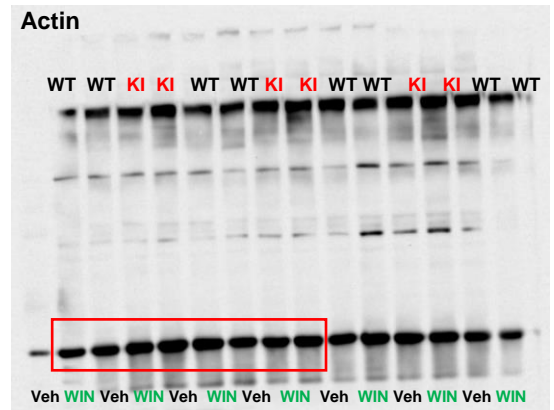

# Supplementary Figure 8

## PSD95

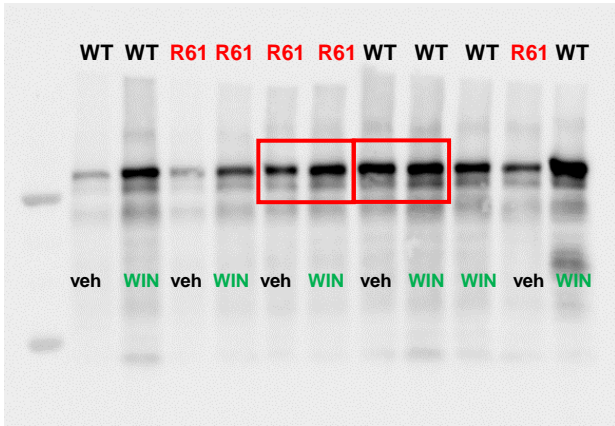

## Actin

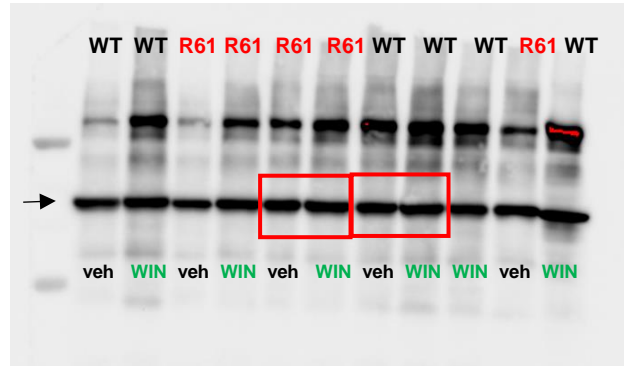

## BDNF

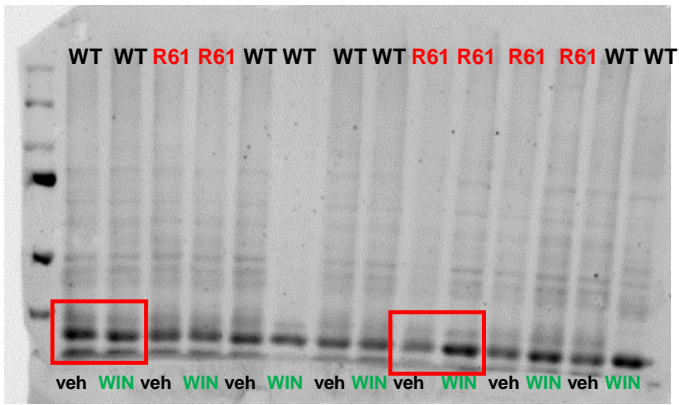

## Actin

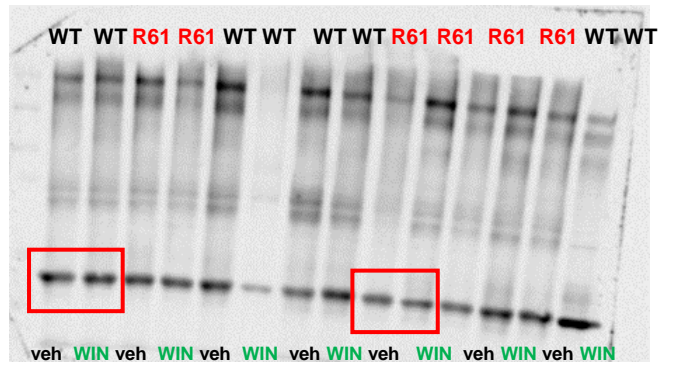

Supplement: MOESM2 [file 40035_2025_500_MOESM2_ESM.pdf]
